# Supplementary material for: Observation of a quality improvement initiative to contextually adapt and use Robson classification in real time to collect data around CS delivery and to develop strategies to reduce CS rate
Source: HighWire-hosted journal article supplement (doi:10.1136/bmjoq-2023-002315), 2023-10-01
Supplement: bmjoq-2023-002315supp001_data_supplement.pdf [file bmjoq-2023-002315supp001_data_supplement.pdf]

**Supplementary File 1- Robson Classification for indications of Caesarean Section**

The 10 groups of the Robson classification

Group 1: Nulliparous women with a single cephalic pregnancy,  $\geq 37$  weeks gestation in spontaneous labour

Group 2: Nulliparous women with a single cephalic pregnancy,  $\geq 37$  weeks gestation who had labour induced or were delivered by caesarean section (CS) before labour

2a Labour induced

2b Prelabour CS

Group 3: Multiparous women without a previous CS, with a single cephalic pregnancy,  $\geq 37$  weeks gestation in spontaneous labour

Group 4: Multiparous women without a previous CS, with a single cephalic pregnancy,  $\geq 37$  weeks gestation who had labour induced or were delivered by CS before labour

4a Labour induced

4b Prelabour CS

Group 5: All multiparous women with at least one previous CS, with a single cephalic pregnancy,  $\geq 37$  weeks gestation

Group 6: All nulliparous women with a single breech pregnancy

Group 7: All multiparous women with a single breech pregnancy including women with previous CS(s)

Group 8: All women with multiple pregnancies including women with previous CS(s)

Group 9: All women with a single pregnancy with a transverse or oblique lie, including women with previous CS(s)

Group 10: All women with a single cephalic pregnancy  $< 37$  weeks gestation, including women with previous CS(s)
